# Supplementary material for: Functionalization of polymeric nanoparticles with targeting VNAR ligands using vinyl sulfone conjugation
Source: Royal Society of Chemistry journal article supplement (doi:10.1039/d2tb01985j), 2023-01-01
Supplement: d2tb01985j1.pdf [file d2tb01985j1.pdf]

Supporting Information

**Functionalization of polymeric nanoparticles with targeting VNAR ligands  
using vinyl sulfone conjugation**

Adam Leach, Marie Finnegan, Mariana S. Machado, Laura Ferguson, John Steven, Peter Smyth, Andrew Porter, Caroline Barelle, Efrosyni Themistou and Christopher J. Scott

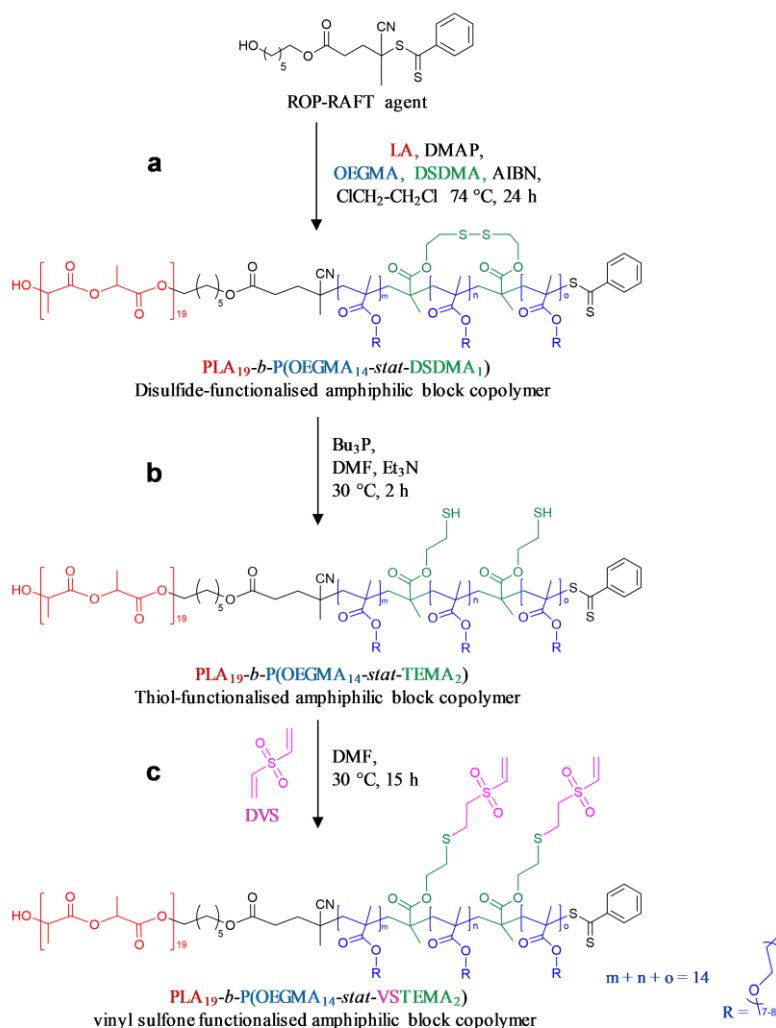

**Scheme S1.** Preparation of vinyl sulfone-functionalized amphiphilic PLA<sub>19</sub>-*b*-P(OEGMA<sub>14</sub>-*stat*-VSTEMA<sub>2</sub>) diblock copolymers. (a) Synthesis of disulfide-functionalized branched amphiphilic PLA<sub>19</sub>-*b*-P(OEGMA<sub>14</sub>-*stat*-DSDMA<sub>1</sub>) diblock copolymer from a dual ROP-RAFT agent by simultaneous ROP of LA and RAFT statistical copolymerization of OEGMA and DSDMA. *Polymerization conditions*: [LA]<sub>0</sub> : [OEGMA]<sub>0</sub> : [DSDMA]<sub>0</sub> : [ROP-RAFT agent]<sub>0</sub> relative molar ratios 20 : 15 : 1 : 1 and 55% w/w solids at 74 °C for 24 h. Indicative intramolecular cycle presented for the disulfide bond although both intramolecular cycles and intermolecular branches are expected to be obtained by this reaction. (b) Formation of a thiol-functionalized linear amphiphilic PLA<sub>19</sub>-*b*-P(OEGMA<sub>14</sub>-*stat*-TEMA<sub>2</sub>) diblock copolymer with thiol groups prepared by reductive cleavage of the disulfide bonds in the methacrylic block of the disulfide-functionalized amphiphilic diblock copolymer. *Reaction conditions*: Bu<sub>3</sub>P in DMF at 30 °C for 2 h with relative molar ratios of [Bu<sub>3</sub>P]<sub>0</sub> : [Et<sub>3</sub>N]<sub>0</sub> : [disulfide bond]<sub>0</sub> of 3.0 : 2.1 : 1. (c) Synthesis of vinyl sulfone-functionalized linear amphiphilic PLA<sub>19</sub>-*b*-P(OEGMA<sub>14</sub>-*stat*-VSTEMA<sub>2</sub>) diblock copolymer by conjugation of divinyl sulfone to the thiol-functionalized amphiphilic diblock copolymer. *Reaction conditions*: DMF, 30 °C, 15 h, excess DVS with relative molar ratio [DVS]<sub>0</sub> : [thiol]<sub>0</sub> of 15 : 1.

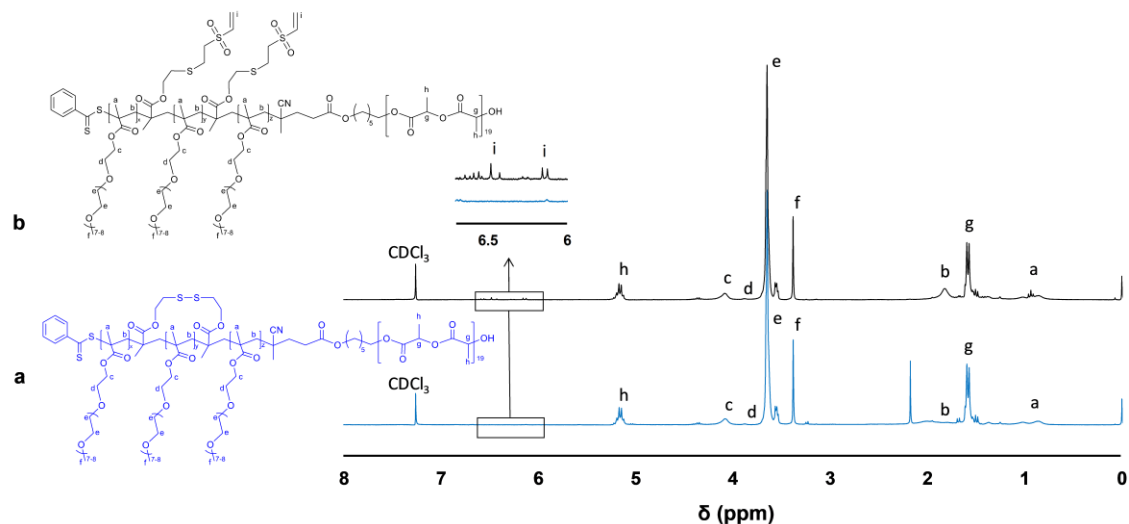

**Figure S1.**  $^1\text{H}$  NMR ( $\text{CDCl}_3$ ) spectra of (a) disulfide-functionalized branched amphiphilic  $\text{PLA}_{19}\text{-}b\text{-P(OEGMA}_{14}\text{-stat-DSDMA}_1)$  and (b) vinyl-sulfone functionalized linear amphiphilic  $\text{PLA}_{19}\text{-}b\text{-P(OEGMA}_{14}\text{-stat-VSTEMA}_2)$  diblock copolymers.

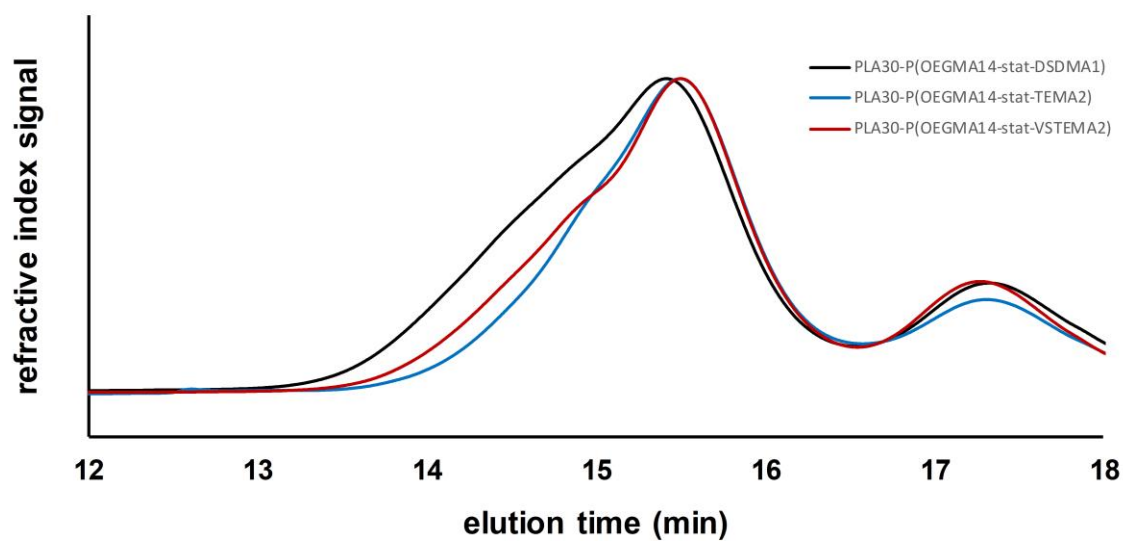

**Figure S2.** SEC (THF) chromatograms of disulfide-functionalized branched amphiphilic  $\text{PLA}_{19}\text{-}b\text{-P(OEGMA}_{14}\text{-stat-DSDMA}_1)$ , thiol-functionalized linear amphiphilic  $\text{PLA}_{19}\text{-}b\text{-P(OEGMA}_{14}\text{-stat-TEMA}_2)$  and vinyl-sulfone functionalized linear amphiphilic  $\text{PLA}_{19}\text{-}b\text{-P(OEGMA}_{14}\text{-stat-VSTEMA}_2)$  diblock copolymers.

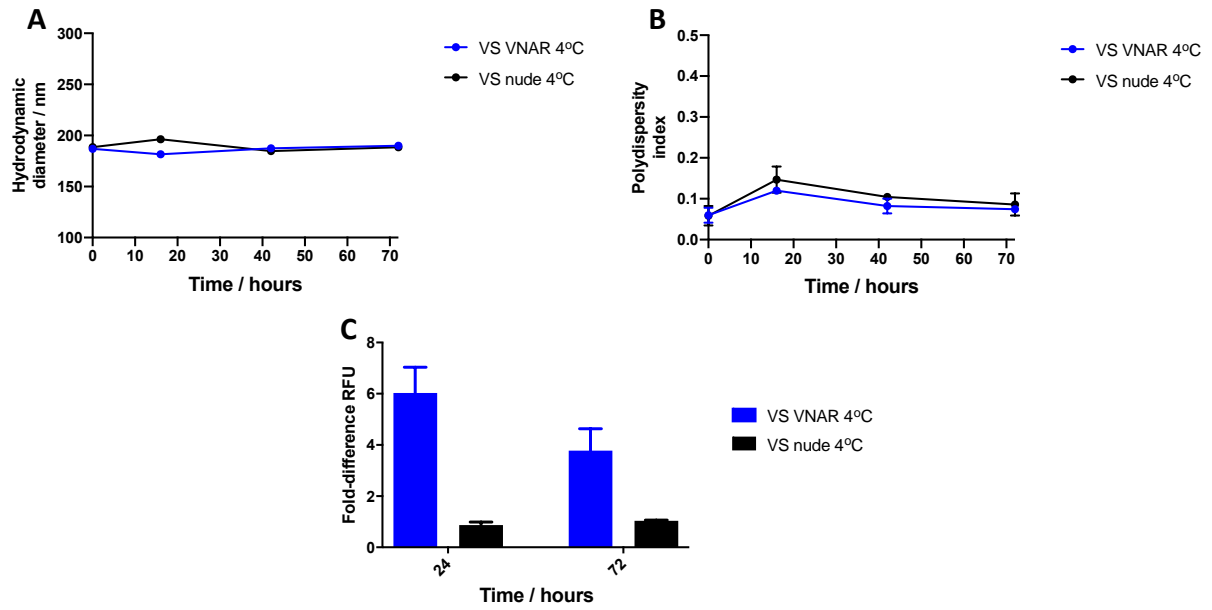

**Figure S3. Assessment of VNAR-functionalized (VS VNAR) and vinyl-sulfone functionalized (VS nude) nanoparticle formulations stored in PBS buffer suspension at 4°C between 0 and 72 h at predetermined intervals: (A) Hydrodynamic diameter by DLS, (B) polydispersity index value by DLS and (C) binding by fluorescent plate based binding assay, data presented as fold difference fluorescence between DLL4-Fc coated and uncoated wells at 24 and 72 h post VNAR conjugation.**
